1 The dynamics of cell-free DNA from urine and blood after a full marathon

2 Short title: Serum and urine cfDNA after full marathon

3

4 Yasuhiro Shishikura<sup>1,†</sup>, Katsuyuki Tokinoya<sup>2,†</sup>, Yuichi Aita<sup>3,\*</sup>, Nanami Sekine<sup>1</sup>, Takehito Sugawara<sup>2</sup>,

5 Yasuko Yoshida<sup>4</sup>, Keisei Kosaki<sup>5</sup>, Shota Kumamoto<sup>1</sup>, Keisuke Ishikura<sup>6</sup>, Tomoaki Kuji<sup>7</sup>, Yasushi

6 Kawakami<sup>2</sup>, Yoshiharu Nabekura<sup>5</sup>, Seiji Maeda<sup>5</sup>, Kazuhiro Takekoshi<sup>2,\*</sup>

7

8 <sup>1</sup> Graduate School of Comprehensive Human Sciences, University of Tsukuba, Ibaraki, Japan

9 <sup>2</sup> Laboratory of Laboratory/Sports medicine, Division of Clinical Medicine, Faculty of Medicine,

10 University of Tsukuba, Ibaraki, Japan

11 <sup>3</sup> Nutrigenomics Research Group, Faculty of Medicine, University of Tsukuba, Ibaraki, Japan

12 <sup>4</sup> Department of Medical Technology, Faculty of Health Sciences, Tsukuba International University,

13 Ibaraki, Japan

14 <sup>5</sup> Faculty of Health and Sport Sciences, University of Tsukuba, Ibaraki, Japan

15 <sup>6</sup> Faculty of Management, Josai University, Saitama, Japan

16 <sup>7</sup> Doctoral Program in Sports Medicine, Graduate School of Comprehensive Human Sciences,

17 University of Tsukuba, Ibaraki, Japan

18 † These authors contributed equally to this study.

19

20 \*Corresponding Author

21 Kazuhiro Takekoshi, *Division of Clinical Medicine, Faculty of Medicine, University of Tsukuba, 1-1-1*

22 *Tennodai, Tsukuba, Ibaraki 305-8577, Japan*

23 Tel: +81-29-853-3389; E-mail: [k-takemd@md.tsukuba.ac.jp](mailto:k-takemd@md.tsukuba.ac.jp)

24 Yuichi Aita, *Nutrigenomics Research Group, Faculty of Medicine, University of Tsukuba, 1-1-1*

25 *Tennodai, Tsukuba, Ibaraki 305-8577, Japan*

26 Tel: +81-29-853-3455; E-mail: [yaita@md.tsukuba.ac.jp](mailto:yaita@md.tsukuba.ac.jp)

27

28 **Acknowledgments**

29 All subjects participated in this study. In addition, we would like to thank Editage  
30 (www.editage.com) for English language editing. This work was supported by JSPS KAKENHI  
31 (Grant Number: 19K11434). There are no conflicts of interest to disclose. The results of the study are  
32 presented clearly, honestly, and without fabrication, falsification, or inappropriate data manipulation.

33

34

## **Abstract**

### **Purpose**

36 Cell-free DNA (cfDNA) has been investigated as a minimally invasive biomarker for many diseases,  
37 particularly cancer. An increase in cfDNA has been observed during exercise. Neutrophil extracellular  
38 traps (NETs) may be the origin of cfDNA in response to acute exercise, but the mechanisms of  
39 generation of cfDNA during exercise remain unclear. In this study we investigated the dynamics of  
40 serum and urinary cfDNA levels and determined the relevance of other biomarkers to serum and  
41 urinary cfDNA levels and fragment size after a full marathon.

### **Methods**

43 Samples were collected from 23 healthy male subjects. Blood and urine samples were collected before  
44 and immediately, two hours, and one day after the full marathon. The measurements included serum  
45 and urinary cfDNA, creatine kinase, myoglobin, creatinine, white blood cells, platelets, and lactoferrin  
46 from blood, and amylase, albumin, and creatinine from urine.

### **Results**

48 Serum and urinary cfDNA levels increased after a full marathon. Creatine kinase, myoglobin, and  
49 creatinine in blood, and albumin and creatinine in urine also increased significantly after a full  
50 marathon. Serum cfDNA showed peak values about 180 bp after the full marathon. Values over 1000  
51 bp were present at two hours post-marathon. Urinary cfDNA showed peak values from 35 bp to 50 bp  
52 after the full marathon. Values over 1000 bp appeared at Immediately and two hours post marathon.

### **Conclusion**

54 This study revealed that both serum and urinary cfDNA levels transiently increased after a full  
55 marathon. In addition, these cfDNA fragment varied in size.

56

57 Keywords: liquid biopsy, exercise, running, fragment size, lactoferrin

58 **Introduction**

59 Running has a significant positive effect on the body, improving cardiorespiratory function and  
60 preventing and ameliorating various diseases<sup>1</sup>. Recently, the number of people participating in full  
61 marathons (42.195 km) has increased in accordance with an increase in the popularity of running<sup>2</sup>.  
62 However, previous studies have suggested that completing a full marathon results in systemic damage  
63 to various tissues and organs, such as muscle, heart, liver, and kidneys<sup>3-8</sup>. Therefore, there is a need for  
64 biomarkers that can identify the conditions within the body during and after endurance exercises.

65 Cell-free DNA (cfDNA) comprises extracellular free DNA fragments that are released upon stress  
66 induction, and that circulate in the body fluids<sup>9</sup>. cfDNA has been examined as a non-invasive  
67 diagnostic biomarker for various diseases, including cancer<sup>9,10</sup>. Previous studies have reported that  
68 blood cfDNA levels are increased following various exercises<sup>11-16</sup>. Blood cfDNA levels peak  
69 immediately after acute exercise and recover rapidly to the baseline level. The typical markers of  
70 skeletal muscle damage, such as creatine kinase (CK), are increased several days after exercise<sup>15,16</sup>.  
71 Additionally, strenuous exercise causes internal stress that damages leukocytes, injures muscle tissues,  
72 and leads to acute inflammatory responses via oxidative stress<sup>3,4,6-8</sup>. Therefore, since cfDNA can be  
73 produced in response to several vital reactions, it may be a novel biomarker for responses to exercise  
74 including muscle damage, inflammation, and oxidative stress.

75 cfDNA circulating in the body has several fragment sizes<sup>17</sup>. Small cfDNA fragments of  
76 approximately 180 bp in size accumulate in the blood of subjects with a variety of conditions,  
77 including pregnancy, cancer, liver or bone marrow transplantation, and systemic lupus  
78 erythematosus<sup>18</sup>. Human blood sometimes contains cfDNA fragments larger than 10,000 bp in size,  
79 which originate from cell necrosis<sup>19</sup>. Recently, the characteristics of the cfDNA fragment profile have  
80 been evaluated in several different cell lines, and it has been found that there are different forms of  
81 cfDNA release patterns in every cell line tested<sup>20</sup>. Therefore, measuring the size of cfDNA fragments

82 induced by strenuous exercise can provide insights into the origin and physiological function of  
83 cfDNA.

84 It has been suggested that blood cfDNA induced by exercise is derived not only from apoptosis or  
85 necrosis, but also from neutrophil extracellular traps (NETs)<sup>11</sup>. It is possible that increased blood  
86 cfDNA levels due to exercise are derived from apoptosis or necrosis-induced skeletal muscle damage  
87 in a full marathon, because of the presence of increased muscle damage markers or necrosis after a full  
88 marathon<sup>3-5</sup>. Acute exercise causes apoptosis in the skeletal muscle of rats<sup>21</sup>. Atamaniuk et al. showed  
89 that blood cfDNA may be derived from leukocytes during an ultra-marathon<sup>12</sup>. Beiter et al. described  
90 exercise-induced release of NETs<sup>22</sup>. Recent studies have partly revealed the role of lactoferrin, a  
91 component of NETs<sup>23,24</sup>. Lactoferrins inhibit the formation of NETs, possibly by preventing their  
92 spread<sup>25</sup>. However, the mechanism of generation of lactoferrin in exercise-induced NETs remains  
93 unclear. If a relationship between existing exercise markers and the size of cfDNA fragments induced  
94 by exercise can be confirmed, analysis of this relationship may aid in understanding the internal  
95 conditions of the body. However, previous studies regarding the effect of cfDNA on exercise have  
96 only examined cfDNA in blood, rather than using the non-invasive approach of measuring urinary  
97 cfDNA. Resistance exercise increases the production of urinary titin N-terminal fragments and muscle  
98 damage markers<sup>26</sup>. Therefore, it is likely that urinary cfDNA changes in concentration and fragment  
99 size after a full marathon.

100 The purpose of this study was to investigate the dynamics of serum and urinary cfDNA levels and  
101 fragment sizes after a full marathon. Muscle damage markers, stress hormones, and inflammatory  
102 responses known to be affected by exercise were measured to assess the body conditions, and their  
103 association with serum and urinary cfDNA levels and fragment sizes after a full marathon was  
104 investigated.

105

106 **Methods**

107 **Ethical approval**

108 This study was approved by the Ethical Committee of the Faculty of Medicine at the University of  
109 Tsukuba (Approval number: 274). All subjects received an explanation and documents in advance  
110 regarding the purpose of the experiment, its contents, and safety issues, and indicated their informed  
111 consent.

112

113 **Subjects**

114 Twenty-six healthy male subjects who undertook aerobic exercise at least twice per week were  
115 recruited. The sample size was determined by previous studies<sup>4,27</sup>. The subjects completed the 38th  
116 Tsukuba Marathon. Subject characteristics are provided in Table 1. The subjects were instructed not to  
117 drink alcohol, to get sufficient sleep, and to avoid binge eating before the experiment. The subjects  
118 freely performed warmups and drank water on the day of the full marathon. In this study, three  
119 subjects were removed after exceeding the criteria for maximum levels of general biomarkers,  
120 including C-reactive protein and urinary albumin, in sedentary conditions before the full marathon.

121

122 **Experimental design**

123 Measurements were collected immediately before (Pre) and after (Post) the full marathon, as well as  
124 two hours after completing the full marathon (2H), and the day after the full marathon (D1). The  
125 subjects drank only water between the Post and 2H measurements. The full marathon was completed  
126 at a temperature of 12.7 °C with a humidity level of 60.6%.

127 Blood and urine samples were collected early in the morning or after the full marathon. Blood  
128 samples were divided into plasma with heparin natrium and serum. Plasma samples were separated by  
129 centrifugation for 15 min at 4°C at 3000 rpm. Serum samples were separated by centrifugation for 15  
130 min at 3000 rpm after sitting for 30 min at room temperature. These samples were stored at -80°C  
131 until further analysis.

132 **Extracted cell-free DNA in blood and urine**

133 Serum cfDNA (500  $\mu$ L) was extracted using Serum Cell-Free Circulating DNA Purification Mini Kits  
134 (Norgen Biotek Corp.). Urinary cfDNA (10 mL) was extracted using Urine Cell-Free Circulating  
135 DNA Purification Mini Kits (Norgen Biotek Corp.). Extracted serum and urinary cfDNA were diluted  
136 in 30  $\mu$ L and 50  $\mu$ L of Elution Buffer, respectively.

137 Total cfDNA was measured using an Agilent Bioanalyzer 2100 (Agilent Technologies Corp.) using  
138 High-Sensitivity DNA kits, following the manufacturer's instructions. The small fragment size in  
139 serum cfDNA was below 200 bp, while the large fragment size in cfDNA was above 1000 bp, as  
140 determined by previous studies<sup>28</sup>. The levels of each fragment size in the serum cfDNA were analysed  
141 in terms of peak value levels of small and large fragment sizes in the serum cfDNA. Other fragment  
142 sizes (201 bp-999 bp) in serum cfDNA were not analysed, because their conspicuous peak values were  
143 not observed.

144

145 **Biomarkers**

146 Serum creatine kinase (CK) activity and myoglobin (Mb) levels were measured as skeletal muscle  
147 damage markers. Serum creatinine kinase, urinary amylase, albumin, and creatinine levels were also  
148 measured. Estimated glomerular filtration values (eGFRs) using serum creatinine concentrations were  
149 calculated by the Modification of Diet in Renal Disease (MDRD) equation for Japanese individuals.

150 "eGFR (ml/min/1.73 m<sup>2</sup>) = 194  $\times$  [Concentration of serum CRE (mg/dl)]<sup>-1.094</sup>  $\times$  [Age]<sup>-0.287</sup>,"

151 White blood cells (WBCs) and their isoforms were measured as inflammation markers. Serum  
152 lactoferrin levels were measured using ELISA according to the manufacturer's instructions. The  
153 analysis was conducted at three time points: Pre, Post, and 2H.

154

155 **Statistical analysis**

156 All results are presented as mean or mean  $\pm$  standard deviation. GraphPad Prism 7 software (GraphPad,  
157 Inc., La Jolla, CA, USA) was used. All data were analysed with non-parametric tests of  
158 homoscedasticity. All results were analysed using Dunn's multiple comparisons method. Correlation  
159 analysis was conducted using the Spearman method. Significance levels were set at  $p < 0.05$  or  $p <$   
160 0.01.

161

## 162 **Results**

### 163 **Serum and urinary cfDNA concentrations**

164 Serum cfDNA levels after a full marathon are shown in Fig. 1. Total serum cfDNA levels were  
165 increased immediately after the full marathon and showed higher values at 2H than at Pre, although  
166 serum cfDNA levels at 2H were lower than those at Post. Serum cfDNA small fragment levels were  
167 increased at Post compared to those at Pre. The levels of serum cfDNA large fragments were increased  
168 immediately at Post and remained high at 2H compared to those at Pre. Representative  
169 electropherogram results of serum cfDNA showed peak values from 170 to 180 bp after the full  
170 marathon. Values over 1000 bp were also present at 2H.

171 Urinary cfDNA levels after the full marathon are shown in Fig. 2. Total urinary cfDNA levels were  
172 increased immediately after the full marathon. It was not possible to analyze the data pertaining to  
173 fragment size in urinary cfDNA due to the level placed on the marker. Representative  
174 electropherogram results for the urinary cfDNA showed peak values from 35 to 50 bp after the full  
175 marathon. Values over 1000 bp also appeared at Post and 2H.

176

### 177 **Biomarker profiles in blood and urine**

178 Serum and urine biomarkers are shown in Table 2. Serum CK activity and Mb levels, the muscle  
179 damage markers, were increased after the full marathon, and maintained significantly higher values on  
180 D1 compared to those at Pre ( $p < 0.05$ ,  $p < 0.01$ ). Serum CK activity peaked on D1, while serum Mb



181 levels peaked at Post or 2H. Serum creatinine levels were increased at Post and 2H compared to those  
182 at Pre. eGFR showed the same pattern of results as serum creatinine. Amylase levels in one of the  
183 urinary markers were unchanged after the full marathon. Urinary creatinine and albumin levels were  
184 increased after the full marathon ( $p < 0.01$ ). Urinary albumin levels maintained a high value at 2H  
185 compared to those at Pre ( $p < 0.01$ ). The albumin/creatinine ratio (ACR) showed the same results as  
186 that of urinary albumin ( $p < 0.01$ ).

187

### 188 **WBC, platelet, and lactoferrin levels**

189 The WBC, platelet, and lactoferrin results are shown in Fig. 3. WBCs and neutrophil levels peaked  
190 significantly at Post, and showed significantly high values at 2H and D1, despite the decrease from 2H  
191 ( $p < 0.05$ ,  $p < 0.01$ ). PLT was increased after the full marathon and maintained significantly higher  
192 values until 2H compared to those at Pre ( $p < 0.05$ ,  $p < 0.01$ ). Serum lactoferrin levels were  
193 significantly increased at Post and 2H compared to those at Pre ( $p < 0.01$ ).

194

### 195 **Discussion**

196 In this study we investigated the possibility of using a novel biomarker as an index for objectively  
197 describing body conditions and fatigue during exercise. Strenuous physical exercise, such as a full  
198 marathon, causes local damage to the muscle tissues. Muscle damage markers, such as serum CK  
199 activity and myoglobin levels, increase due to muscle damage<sup>4,6-8,27</sup>. In this study, the increased serum  
200 CK activity was delayed after the full marathon. These kinetics are in accordance with those of  
201 previous studies<sup>7,16</sup>. In contrast, serum myoglobin levels increased immediately at Post, and decreased  
202 one day later, but were significantly higher than at Pre. Investigation of the dynamics of these markers  
203 confirmed that the muscle tissues suffered damage due to the full marathon.

204

### 205 **Increased serum cfDNA and fragment size after a full marathon**

206 Blood cfDNA levels transiently increase during various exercises, such as resistance and endurance  
207 exercises<sup>11</sup>. In addition to these exercise styles, this study suggests that serum cfDNA levels increase  
208 rapidly after a full marathon. This increase in cfDNA levels was immediately apparent, and then  
209 decreased to the baseline one day later. Our findings were in accordance with those of previous  
210 studies<sup>12,15,16</sup>. Levels of neutrophils and lactoferrins, which are the origin and component parts of  
211 NETs, increased after a full marathon<sup>6,8</sup>. Neutrophils induced during endurance exercise may function  
212 as host defences, involved in processes such as phagocytosis, degranulation, cytokine production, and,  
213 most recently described, NET production<sup>29,30</sup>. NET formation is considered to be the origin of  
214 increased cfDNA levels upon exercise<sup>31</sup>. On the other hand, copy number of cell free-mitochondria  
215 DNA (cf-mtDNA) also was increased by acute physical stress in previous study<sup>32,33</sup>. However, these  
216 results indicated copy number but not concentration in circulating blood. In addition, Hummel et al.  
217 reported copy number of cfDNA showed higher value than that of cf-mtDNA after acute exercise<sup>32</sup>.  
218 Therefore, these results suggested that almost all cfDNAs induced by a full marathon might have been  
219 derived from NETs.

220 In this study, the fragment size of serum cfDNA accumulated after a full marathon was measured.  
221 Our findings suggest that the cfDNA fragment size Pre marathon peaked at approximately 170 bp-180  
222 bp (short fragments), and these short fragments accumulated immediately after the full marathon.  
223 cfDNA fragments >1000bp in size (large fragments) accumulated later, and the peak was lower than  
224 that of the short fragments. It has been reported that normal human plasma samples primarily contain  
225 cfDNA fragments of around 180 bp, and cfDNA fragments larger than 2000 bp cannot be detected.  
226 The primary origins of the circulating DNA in the blood are apoptotic, but not necrotic, cells<sup>34</sup>. In  
227 addition, small portions of the nucleus are released as NETs, a phenomenon which was most recently  
228 described in vivo after infection<sup>35</sup>. Therefore, cfDNA fragments shorter than 200 bp are probably  
229 derived from apoptosis, a form of programmed cell death, and possibly by NETosis, which releases  
230 NET formation from activated neutrophils. It has been found that plasma in cancer patients shows a

231 time-dependent increase in cfDNA fragments over 10,000 bp in size. These larger fragments of  
232 cfDNA have been hypothesised to originate from the death of cells via necrosis<sup>12</sup>. A full marathon also  
233 induces necrosis through damage to the skeletal muscle<sup>3</sup>. Some of the subjects in this study also  
234 accumulated larger cfDNA fragments of over 1,000 bp. Short fragments were present immediately  
235 after a full marathon, whereas large fragments were induced 2 h later in most subjects. These results  
236 suggest that large fragments may be released by a different mechanism from short fragments, and  
237 contain DNA from the necrotic cells of damaged muscle tissues. In this way, differences in the timing  
238 of distribution and release of cfDNA fragments of different sizes may be due to their different origins  
239 and mechanisms. Confirmation of the distribution in cfDNA fragment size may make it possible to  
240 identify cfDNA derived from either type of cell death.

241

#### 242 **Urinary cfDNA after a full marathon**

243 This study showed for the first time, to the best of our knowledge, that urinary cfDNA levels were  
244 increased immediately after a full marathon. In the same way as serum samples taken after a full  
245 marathon, the levels of urinary cfDNA increased immediately after the exertion, and recovered to  
246 baseline levels one day later. Urinary cfDNA is derived either from cells shed into the urine from the  
247 genitourinary tract, or from cfDNA in systemic circulation passing through glomerular filtration<sup>36,37</sup>.  
248 The glomerular barrier discriminates between transported solutes based on size, charge, and shape<sup>38</sup>.  
249 In this study, ACR and eGFR, an index of renal function, showed significant increases after the full  
250 marathon. There has been a report of acute kidney injury developing after a full marathon<sup>6</sup>. Therefore,  
251 high-molecular-weight albumin was excreted through the kidney barrier into the urine, thereby  
252 increasing the levels of urinary cfDNA after the full marathon. Since marathon runners have been  
253 observed to develop a transient acute kidney injury (AKI) with urine sediment in a previous study, the  
254 increase in serum creatinine and urinary ACR after a full marathon may also represent a kidney

255 injury<sup>6,39</sup>. It is possible that renal condition and urinary cfDNA levels are strongly related, as it has  
256 also been reported that AKI increases urinary cfDNA levels<sup>40</sup>.

257 Urinary cfDNA fragment size, as well as serum cfDNA fragment size, changed after a full marathon,  
258 although the sizes were different. The length of serum cfDNA fragments increased by approximately  
259 180 bp, whereas urinary cfDNA fragments increased by approximately 35 bp-50 bp in size. The  
260 primary function of the glomeruli in the kidneys is to filter low molecular weight wastes into the urine,  
261 and regulate the passage of albumin and large macromolecules, which are necessary for  
262 homoeostasis<sup>38</sup>. Large fragments in urinary cfDNA accumulated late, as was seen in serum cfDNA. If  
263 the large fragments in serum cfDNA are derived from necrotic cells, it is likely that they are also  
264 derived from the same source in urine. The large fragments derived from necrotic cells may arise from  
265 the urinary tract through the kidney filter, or from muscle damage due to exercise. It is possible that  
266 the large fragments in urinary cfDNA are related to the muscle damage markers, but this study did not  
267 measure urinary muscle damage markers. In a future study, it will be necessary to measure urinary  
268 muscle damage markers as well as urinary cfDNA level.

269

270 In conclusion, serum and urinary cfDNA levels were transiently increased after a full marathon. As  
271 regards size profile of cfDNA, the short fragment size of serum cfDNA accumulated immediately after  
272 the full marathon and large fragments accumulated later. Urinary cfDNA also had fragments of larger  
273 size after a full marathon. However, it is necessary to investigate the effects of intensity, time, style of  
274 exercise, and sex on cfDNA levels to use this molecule an exercise biomarker, as its physiological  
275 significance remains to be clarified.

276

## 277 **Perspective**

278 Sports medicine research into exercise biomarkers aims to improve health, performance, and  
279 recovery. However, there are few recommendations for biomarkers for tracking changes in individuals

280 participating in physical activity and exercise training programs<sup>41</sup>. Previous studies have reported that  
281 aerobic and anaerobic exercise induces an immediate and transient increase in blood cfDNA levels<sup>11</sup>.  
282 The present study suggested that blood cfDNA levels peaked immediately after a full marathon.  
283 Urinary cfDNA levels also increased transiently. It is clinically important to identify immediate,  
284 non-invasive biomarkers such as cfDNA for the development of tailored exercise programs to prevent  
285 overwork and disease. Haller et al. (2018) reported that cfDNA showed the most pronounced increase  
286 that has ever been reported, compared to other biomarkers, in an acute intermittent exercise setting<sup>13</sup>.  
287 The results of this study provide new possibilities for the early detection and monitoring of internal  
288 stress caused by exercise.

289

#### 290 **Authorships**

291 K Tokinoya, YA, and K Takekoshi contributed to the design. YS, K Tokinoya, NS, TS, YY, KK, SK,  
292 KI, TK, YN, SM, and K Takekoshi performed data acquisition. YS, K Tokinoya, TS, and K Takekoshi  
293 analysed and interpreted the data. YS and K Tokinoya performed the statistical analyses. YS and K  
294 Tokinoya drafted the manuscript. All authors supervised and edited the manuscript. All authors have  
295 reviewed the manuscript. All authors provided final approval of this version of the manuscript for  
296 publication and agreed to be accountable for all aspects of the work.

297

#### 298 **References**

- 299 1. Lee D chul, Brellenthin AG, Thompson PD, Sui X, Lee IM, Lavie CJ. Running as a Key  
300 Lifestyle Medicine for Longevity. Prog Cardiovasc Dis 2017;60:45–55.
- 301 2. TOKYO MARATHON FOUNDATION. Available at: <https://tokyo42195.org>. Accessed  
302 October 5, 2020.

- 303 3. Hikida RS, Staron RS, Hagerman FC, Sherman WM, Costill DL. Muscle fiber necrosis  
304 associated with human marathon runners. *J Neurol Sci* 1983;59:185–203.
- 305 4. Shin KA, Park KD, Ahn J, Park Y, Kim YJ. Comparison of Changes in Biochemical Markers  
306 for Skeletal Muscles, Hepatic Metabolism, and Renal Function after Three Types of  
307 Long-distance Running. *Medicine (Baltimore)* 2016;95:1–6.
- 308 5. Neilan TG, Yoerger DM, Douglas PS, Marshall JE, Halpern EF, Lawlor D, Picard MH, Wood  
309 MJ. Persistent and reversible cardiac dysfunction among amateur marathon runners. *Eur Heart*  
310 *J* 2006;27:1079–1084.
- 311 6. Calleja-González J, Salinero JJ, Fernández D, Ruiz D, Gallo C, Del Coso J, Pérez-González B,  
312 González-Millán C, Areces F, Abián-Vicen J. Running Pace Decrease during a Marathon Is  
313 Positively Related to Blood Markers of Muscle Damage. *PLoS One* 2013;8:e57602.
- 314 7. Ryu JH, Cho SY, Roh HT, Shin KO, Paik IY, Woo JH. Impact of different running distances  
315 on muscle and lymphocyte DNA damage in amateur marathon runners. *J Phys Ther Sci*  
316 2016;28:450–455.
- 317 8. Hessel E, Haberland A, Müller M, Lerche D, Schimke I. Oxygen radical generation of  
318 neutrophils: A reason for oxidative stress during marathon running? *Clin Chim Acta*  
319 2000;298:145–156.
- 320 9. Gai W, Sun K. Epigenetic biomarkers in cell-free DNA and applications in liquid biopsy.  
321 *Genes (Basel)* 2019;10:.
- 322 10. Valpione S, Gremel G, Mundra P, Middlehurst P, Galvani E, Girotti MR, Lee RJ, Garner G,  
323 Dhomen N, Lorigan PC, Marais R. Plasma total cell-free DNA (cfDNA) is a surrogate  
324 biomarker for tumour burden and a prognostic biomarker for survival in metastatic melanoma  
325 patients. *Eur J Cancer* 2018;88:1–9.
- 326 11. Breitbach S, Tug S, Simon P. Circulating Cell-Free DNA: An Up-Coming Molecular Marker  
327 in in Exercise Physiology Sarah. *Sports Medicine. Sport Med* 2012;42:565–586.

- 328 12. Atamaniuk J, Stuhlmeier KM, Vidotto C, Tschan H, Dossenbach-Glaninger A, Mueller MM.  
329 Effects of ultra-marathon on circulating DNA and mRNA expression of pro- and anti-apoptotic  
330 genes in mononuclear cells. *Eur J Appl Physiol* 2008;104:711–717.
- 331 13. Haller N, Helmig S, Taenny P, Petry J, Schmidt S, Simon P. Circulating, cell-free DNA as a  
332 marker for exercise load in intermittent sports. *PLoS One* 2018;13:1–12.
- 333 14. Andreatta M V., Curty VM, Coutinho JVS, Santos MÂA, Vassallo PF, de Sousa NF, Barauna  
334 VG. Cell-free DNA as an earlier predictor of exercise-induced performance decrement related  
335 to muscle damage. *Int J Sports Physiol Perform* 2018;13:953–956.
- 336 15. Haller N, Tug S, Breitbach S, Jörgensen A, Simon P. Increases in circulating cell-free DNA  
337 during aerobic running depend on intensity and duration. *Int J Sports Physiol Perform*  
338 2017;12:455–462.
- 339 16. Fatouros IG, Jamurtas AZ, Nikolaidis MG, Destouni A, Michailidis Y, Vrettou C, Douroudos  
340 II, Avloniti A, Chatzinikolaou A, Taxildaris K, Kanavakis E, Papassotiriou I, Kouretas D.  
341 Time of sampling is crucial for measurement of cell-free plasma DNA following acute aseptic  
342 inflammation induced by exercise. *Clin Biochem* 2010;43:1368–1370.
- 343 17. Jiang P, Lo YMD. The Long and Short of Circulating Cell-Free DNA and the Ins and Outs of  
344 Molecular Diagnostics. *Trends Genet* 2016;32:360–371.
- 345 18. Sollberger G, Tilley DO, Zychlinsky A. Neutrophil Extracellular Traps: The Biology of  
346 Chromatin Externalization. *Dev Cell* 2018;44:542–553.
- 347 19. Jahr S, Hentze H, Englisch S, Hardt D, Fackelmayer FO, Hesch RD, Knippers R. DNA  
348 fragments in the blood plasma of cancer patients: Quantitations and evidence for their origin  
349 from apoptotic and necrotic cells. *Cancer Res* 2001;61:1659–1665.
- 350 20. Aucamp J, Bronkhorst AJ, Peters DL, Van Dyk HC, Van der Westhuizen FH, Pretorius PJ.  
351 Kinetic analysis, size profiling, and bioenergetic association of DNA released by selected cell  
352 lines in vitro. *Cell Mol Life Sci* 2017;74:2689–2707.

- 353 21. Arslan S, Erdem S, Sivri A, Hasçelik Z, Tan E. Exercise-induced apoptosis of rat skeletal  
354 muscle and the effect of meloxicam. *Rheumatol Int* 2002;21:133–136.
- 355 22. Beiter T, Fragasso A, Hudemann J, Schild M, Steinacker J, Mooren FC, Niess AM.  
356 Neutrophils release extracellular DNA traps in response to exercise. *J Appl Physiol*  
357 2014;117:325–333.
- 358 23. Urban CF, Ermert D, Schmid M, Abu-Abed U, Goosmann C, Nacken W, Brinkmann V,  
359 Jungblut PR, Zychlinsky A. Neutrophil extracellular traps contain calprotectin, a cytosolic  
360 protein complex involved in host defense against *Candida albicans*. *PLoS Pathog* 2009;5:.
- 361 24. Galuska SP, Kühnle A, Lütteke T, Bornhöfft KF. Polysialic acid modulates the binding of  
362 external lactoferrin in neutrophil extracellular traps. *Biology (Basel)* 2019;8:.
- 363 25. Okubo K, Kamiya M, Urano Y, Nishi H, Herter JM, Mayadas T, Hirohama D, Suzuki K,  
364 Kawakami H, Tanaka M, Kurosawa M, Kagaya S, Hishikawa K, Nangaku M, Fujita T,  
365 Hayashi M, Hirahashi J. Lactoferrin Suppresses Neutrophil Extracellular Traps Release in  
366 Inflammation. *EBioMedicine* 2016;10:204–215.
- 367 26. Yamaguchi S, Suzuki K, Inami T, Kanda K, Hanye Z, Okada J. Changes in urinary titin  
368 N-terminal fragment concentration after concentric and eccentric exercise. *J Sport Sci Med*  
369 2020;19:121–129.
- 370 27. Tokinoya K, Ishikura K, Ra SG, Ebina K, Miyakawa S, Ohmori H. Relationship between  
371 early-onset muscle soreness and indirect muscle damage markers and their dynamics after a  
372 full marathon. *J Exerc Sci Fit* 2020;18:115–121.
- 373 28. Breitbach S, Sterzing B, Magallanes C, Tug S, Simon P. Direct measurement of cell-free DNA  
374 from serially collected capillary plasma during incremental exercise. *J Appl Physiol*  
375 2014;117:119–130.



- 376 29. Walsh NP, Gleeson M, Shephard RJ, Jeffrey MG, Woods A, Bishop NC, Fleshner M, Green C,  
377 Pedersen K, Hoffman-goetz L, Rogers CJ, Northoff H, Abbasi A, Simon P. Position  
378 statement. Part one: Immune function and exercise. *Exerc Immunol Rev* 2011;17:6–63.
- 379 30. Delgado-Rizo V, Martínez-Guzmán MA, Iñiguez-Gutierrez L, García-Orozco A,  
380 Alvarado-Navarro A, Fafutis-Morris M. Neutrophil extracellular traps and its implications in  
381 inflammation: An overview. *Front Immunol* 2017;8:1–20.
- 382 31. Beiter T, Fragasso A, Hartl D, Nieß AM. Neutrophil Extracellular Traps: A Walk on the Wild  
383 Side of Exercise Immunology. *Sport Med* 2015;45:625–640.
- 384 32. Hummel EM, Hessas E, Müller S, Beiter T, Fisch M, Eibl A, Wolf OT, Giebel B, Platen P,  
385 Kumsta R, Moser DA. Cell-free DNA release under psychosocial and physical stress  
386 conditions. *Transl Psychiatry* 2018;8:236.
- 387 33. Ohlsson L, Hall A, Lindahl H, Danielsson R, Gustafsson A, Lavant E, Ljunggren L. Increased  
388 level of circulating cell-free mitochondrial DNA due to a single bout of strenuous physical  
389 exercise. *Eur J Appl Physiol* 2020;120:897–905.
- 390 34. Suzuki N, Kamataki A, Yamaki J, Homma Y. Characterization of circulating DNA in healthy  
391 human plasma. *Clin Chim Acta* 2008;387:55–58.
- 392 35. Saunders CA, Parent CA. Emerging roles for the nucleus during neutrophil signal relay and  
393 NETosis. *Curr Opin Cell Biol* 2020;62:135–143.
- 394 36. Botezatu I, Serdyuk O, Potapova G, Shelepov V, Alechina R, Molyaka Y, Anan'ev V,  
395 Bazin I, Garin A, Narimanov M, Knysh V, Melkonyan H, Umansky S, Lichtenstein A. Genetic  
396 analysis of DNA excreted in urine: A new approach for detecting specific genomic DNA  
397 sequences from cells dying in an organism. *Clin Chem* 2000;46:1078–1084.
- 398 37. Lu T, Li J. Clinical applications of urinary cell-free DNA in cancer: Current insights and  
399 promising future. *Am J Cancer Res* 2017;7:2318–2332.

- 400 38. Tryggvason K, Wartiovaara J. How does the kidney filter plasma? *Physiology*  
401 2005;20:96–101.
- 402 39. Wołynec W, Kasproicz K, Rita-Tkachenko P, Marcin R, Ratkowski W. Biochemical  
403 Markers of Renal Hypoperfusion, Hemoconcentration, and Proteinuria after Extreme Physical  
404 Exercise. *Med* 2019;55:E154.
- 405 40. Merkle J, Daka A, Deppe AC, Wahlers T, Paunel-Görgülü A. High levels of cell-free  
406 DNA accurately predict late acute kidney injury in patients after cardiac surgery. *PLoS*  
407 *One* 2019;14:1–15.
- 408 41. Lee EC, Fragala MS, Kavouras SA, Queen RM, Pryor JL, Casa DJ. Biomarkers in Sports and  
409 Exercise. *J Strength Cond Res* 2017;31:2920–2937.

410

411 **Figure legends**

412 Figure 1. Serum cell-free DNA fragment size profiles in a full marathon

413 Serum cell-free DNA fragment size profiles. Capillary electropherogram showing the fragment sizes  
414 of cfDNA extracted from serum samples after a full marathon by a representative subject.

415

416 Figure 2. Urinary cell-free DNA fragment size profiles in a full marathon

417 Urinary cell-free DNA fragment size profiles. Capillary electropherogram showing the fragment sizes  
418 of cfDNA extracted from a urinary sample after a full marathon by a representative subject.

419

420 Figure 3. White blood cell counts and platelet and serum lactoferrin levels

421 White blood cell counts and platelet and serum lactoferrin levels after a full marathon. Data are  
422 presented as mean  $\pm$  SD and individual plots. p values indicate significant differences compared to Pre  
423 ( $*p < 0.05$ ;  $**p < 0.01$ ). White blood cell counts and platelets,  $n = 23$ ; serum lactoferrin levels,  $n = 20$ .

424

425 Table captions

426 Table 1. Participant characteristics

427

428 Table 2. Biomarkers after a full marathon

429 CK, creatine kinase; Mb, myoglobin; ACR, albumin/creatinine ratio. \*  $p < 0.05$ , \*\*  $p < 0.01$  vs Pre

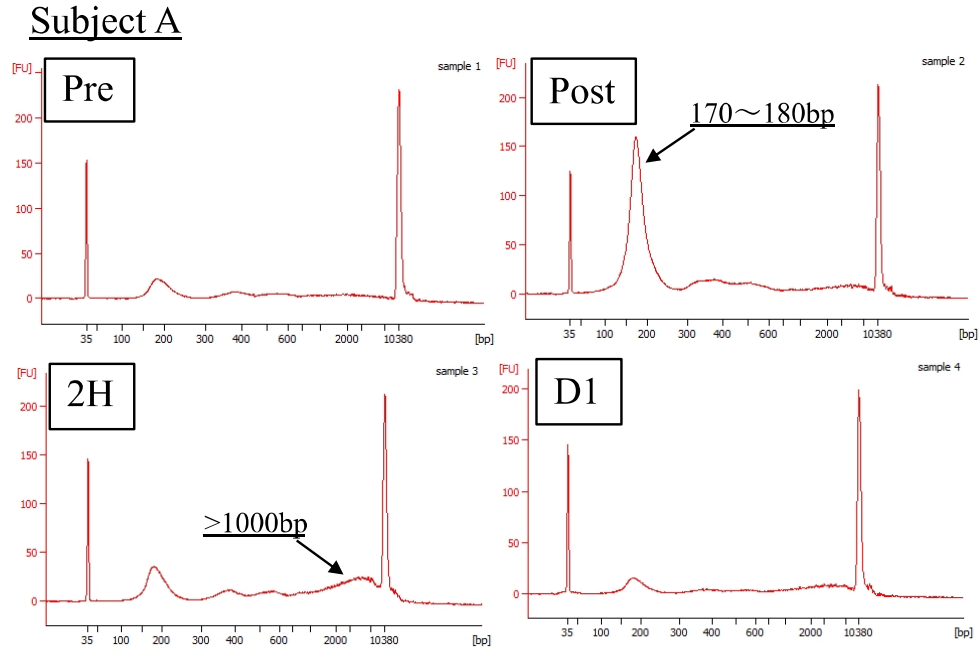

**Figure 1. Serum cell-free DNA fragment size profiles in a full marathon**

Serum cell-free DNA fragment size profiles. Capillary electropherogram showing the fragment sizes of cfDNA extracted from serum samples after a full marathon by a representative subject.

## Subject B

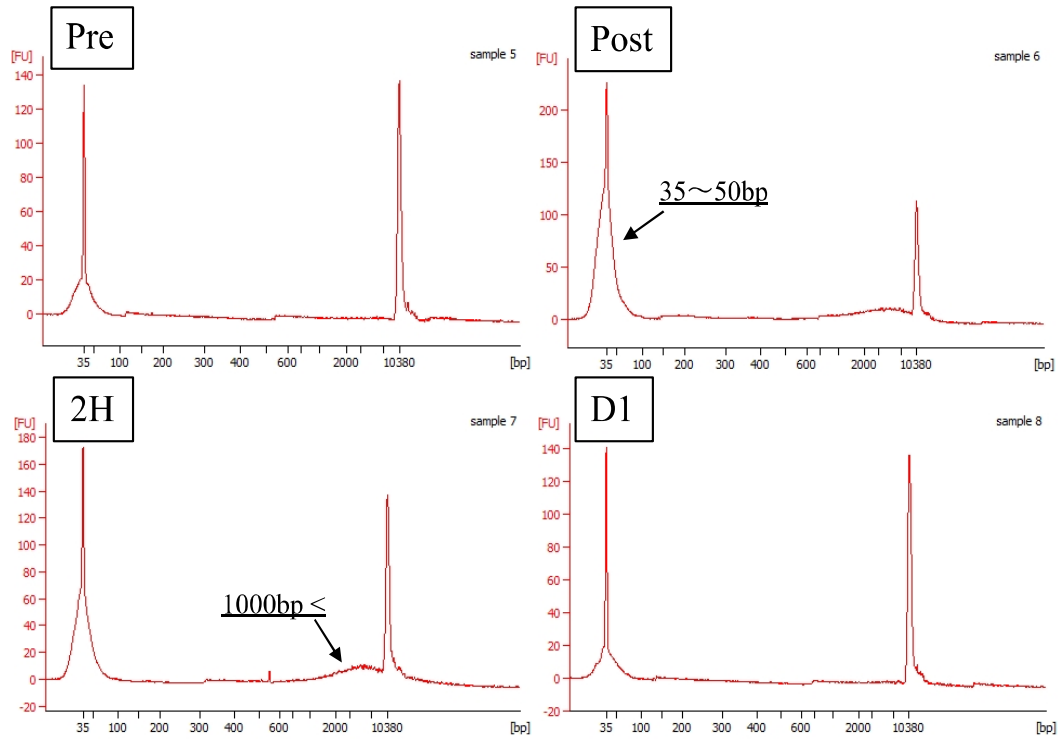

**Figure 2. Urinary cell-free DNA fragment size profiles in a full marathon**

Urinary cell-free DNA fragment size profiles. Capillary electropherogram showing the fragment sizes of cfDNA extracted from a urinary sample after a full marathon by a representative subject.

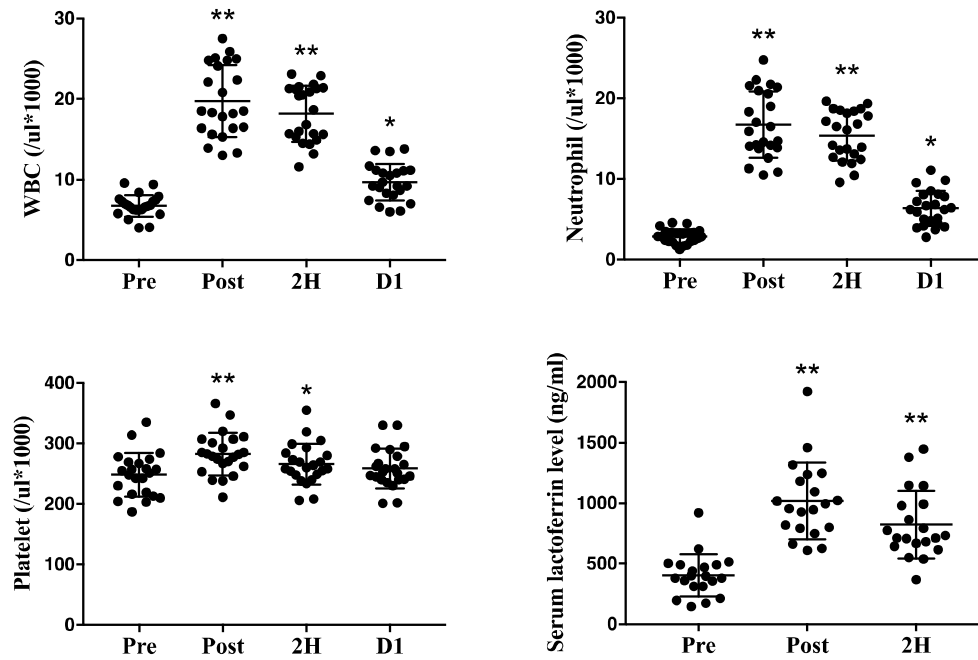

**Figure 3. White blood cell counts and platelet and serum lactoferrin levels**

White blood cell counts and platelet and serum lactoferrin levels after a full marathon. Data are presented as mean  $\pm$  SD and individual plots. p values indicate significant differences compared to Pre (\*p < 0.05; \*\* p < 0.01). White blood cell counts and platelets, n = 23; serum lactoferrin levels, n = 20.

**Table 1. Participants' characteristics in this study**

|     | Age    | Height | Weight | Blood pressure<br>Diastolic/Systolic | 12 min<br>running | Marathon time |
|-----|--------|--------|--------|--------------------------------------|-------------------|---------------|
|     | (year) | (cm)   | (kg)   | (mmHg)                               | (m)               | (h:m:s)       |
| AVE | 25.2   | 172.0  | 64.9   | 125.7 / 74.7                         | 3181.3            | 3:27:14       |
| SD  | 7.3    | 5.3    | 6.9    | 9.1 / 7.9                            | 332.2             | 0:58:48       |

Table 2. Biomarkers after a full marathon

|                                   | Pre         | Post            | 2H              | Day1             |
|-----------------------------------|-------------|-----------------|-----------------|------------------|
| CK (U/L)                          | 151.6±44.3  | 824.5±455.5 *   | 1394.7±801.5 ** | 3247.8±2570.7 ** |
| Mb                                | 30.6±7.9    | 2083.5±1372.9** | 1750.9±952.9 ** | 232.8±193.7 *    |
| Creatinine                        | 0.86±0.11   | 1.04±0.19 **    | 0.96±0.15 *     | 0.88±0.12        |
| eGFR (ml/min/1.73m <sup>2</sup> ) | 92.4±13.0   | 76.5±15.2 **    | 83.3±14.7 *     | 89.0±12.2        |
| Urinary amylase (U/L)             | 381.1±157.4 | 494.0±321.6     | 426.5±289.0     | 424.5±178.0      |
| Urinary albumin (mg)              | 3.3±1.3     | 36.6±38.0 **    | 16.6±16.1 **    | 4.6±2.3          |
| Urinary creatinine (mg/dL)        | 200.1±65.2  | 283.2±161.8 **  | 223.0±156.1     | 224.5±84.2       |
| Urinary ACR                       | 16.8±6.3    | 122.3±111.5 **  | 84.8±74.4 **    | 21.3±8.4         |

CK, creatine kinase; Mb, myoglobin; ACR, albumin/creatinine ratio. \*  $p < 0.05$ , \*\*  $p < 0.01$  vs Pre
